# Supplementary material
Source: publisher figshare collection journal article supplement (https://sage.figshare.com/ndownloader/files/22124907)
Supplement: Supplementary file 1 [file 22124907]

## Supplementary Figure 1.

*Abbreviated version of Assessment of Work Performance by Sandqvist, Lee, & Kielhofner, 2010.*

### Rate overall performance on occupation kit:

| 1                                                                                                                                                                                                                   | 2                                                                                                                                                                                                                      | 3                                                                                                                                                                                                                                 | 4                                                                                                                                        |
|---------------------------------------------------------------------------------------------------------------------------------------------------------------------------------------------------------------------|------------------------------------------------------------------------------------------------------------------------------------------------------------------------------------------------------------------------|-----------------------------------------------------------------------------------------------------------------------------------------------------------------------------------------------------------------------------------|------------------------------------------------------------------------------------------------------------------------------------------|
| <b>Incompetent performance</b><br>The performance of the task is<br>a) inefficient,<br>b) inappropriate, and<br>c) gives unacceptable result. The problems are major and all parameters (a-c) are clearly affected. | <b>Limited performance</b><br>The performance of the task is<br>a) inefficient,<br>b) inappropriate, <u>and/or</u><br>c) gives unacceptable result. One/several (1 or 2) of the parameters (a-c) are clearly affected. | <b>Unsure performance</b><br>Performance of the task is not fully competent with respect to the parameters a-c, but none of them are clearly affected. Normally the assessor has a vague feeling that the performance is reduced. | <b>Competent performance</b><br>The performance of the task is<br>a) efficient,<br>b) appropriate, and<br>c) gives an acceptable result. |

### Use Rating Scale above to rate the following Motor Skills:

|                                                                                                                                                                                                                                                                                                                                                                                                                                                                                                                                                                                                                                                                   |          |   |   |   |   |
|-------------------------------------------------------------------------------------------------------------------------------------------------------------------------------------------------------------------------------------------------------------------------------------------------------------------------------------------------------------------------------------------------------------------------------------------------------------------------------------------------------------------------------------------------------------------------------------------------------------------------------------------------------------------|----------|---|---|---|---|
| <b>1. Posture</b><br>(stabilize, position)                                                                                                                                                                                                                                                                                                                                                                                                                                                                                                                                                                                                                        | LI<br>NR | 1 | 2 | 3 | 4 |
| <b>Posture</b> is the ability to place oneself in relation to the environment appropriate to the performance of the task.<br><b>Stabilize:</b> Ability to maintain balance and trunk control in the situation.<br><b>Position:</b> Postural ability to place the body appropriately to the task one is performing.                                                                                                                                                                                                                                                                                                                                                |          |   |   |   |   |
| <b>2. Mobility</b><br>(reach)                                                                                                                                                                                                                                                                                                                                                                                                                                                                                                                                                                                                                                     | N/A      | 1 | 2 | 3 | 4 |
| <b>Mobility</b> is the ability to move ones body or body parts in relation to the environment.<br><b>Reach:</b> Ability to use arms and trunk to reach and place objects that are out of reach.                                                                                                                                                                                                                                                                                                                                                                                                                                                                   |          |   |   |   |   |
| <b>3. Coordination</b><br>(coordinate, manipulate, flow)                                                                                                                                                                                                                                                                                                                                                                                                                                                                                                                                                                                                          | N/A      | 1 | 2 | 3 | 4 |
| <b>Coordination</b> is the ability to coordinate movements of different body parts in relation to each other and in relation to the environment.<br><b>Coordinate:</b> Ability to coordinate movements in bilateral or multilateral (involving both hands and feet) tasks.<br><b>Manipulate:</b> Ability to use fine motor control to produce small, precise movements and isolated finger movements when handling objects.<br><b>Flow:</b> Ability to use smooth, fluid, and continuous arm and hand movements.                                                                                                                                                  |          |   |   |   |   |
| <b>4. Strength</b><br>(grip, push, pull, lift, transport, calibrate)                                                                                                                                                                                                                                                                                                                                                                                                                                                                                                                                                                                              | N/A      | 1 | 2 | 3 | 4 |
| <b>Strength</b> is the ability to generate and use force appropriate to the requirements of the task.<br><b>Grip:</b> Ability to pinch or grasp objects used in performance.<br><b>Push:</b> Ability to push objects along a supporting surface or about a weightbearing axis.<br><b>Pull:</b> Ability to pull objects along a supporting surface or about a weightbearing axis.<br><b>Lift:</b> Ability to lift objects off a supporting surface.<br><b>Transport:</b> Ability to carry objects while moving from one place to another.<br><b>Calibrate:</b> Ability to regulate strength, speed, and extent of movements according to the requirements of task. |          |   |   |   |   |
| <b>5. Physical energy</b><br>(endure, pace)                                                                                                                                                                                                                                                                                                                                                                                                                                                                                                                                                                                                                       | N/A      | 1 | 2 | 3 | 4 |
| <b>Physical energy</b> is the ability to perform and complete a task within a reasonable amount of time without abnormal physical fatigue.<br><b>Endure:</b> Ability to perform and complete a task without abnormal physical fatigue.<br><b>Pace:</b> Ability to maintain a rate of performance in order to complete the task within a reasonable amount of time.                                                                                                                                                                                                                                                                                                |          |   |   |   |   |
